# Supplementary material for: Monitoring of timely and delayed vaccinations: a nation-wide registry-based study of Norwegian children aged < 2 years
Source: PubMed Central journal article supplement (PMC4643514; doi:10.1186/s12887-015-0487-4), 2015-11-13

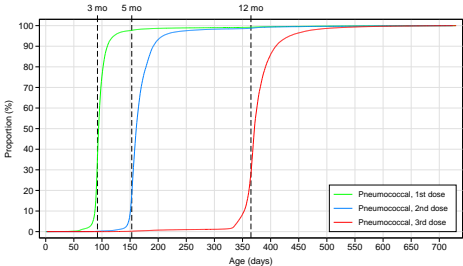

Supplement: 12887_2015_487_MOESM1_ESM.pdf [file 12887_2015_487_MOESM1_ESM.pdf]
